# Supplementary material
Source: publisher site journal article supplement (https://www.dovepress.com/article/566254)
Supplement: Supplementary file 1 [file 566254%2520Revised%2520%2509Supplementary%2520File.docx]

**Full Interview Guide**

**Study Title:** Post-traumatic growth in young and middle-aged breast cancer patients after modified radical mastectomy: A phenomenological study

**Interview Guide**

**I. Introduction and Rapport Building (Approx. 5 minutes)**

"Hello, and thank you so much for agreeing to participate in this study today. My name is Qiuyu Gu, and I am a nursing researcher.

We are conducting a study to better understand the unique experiences of young and middle-aged breast cancer patients after modified radical mastectomy. We are particularly interested in hearing about your personal journey, including the challenges and any positive changes you may have experienced.

Before we begin, I would like to remind you that:

1. This interview will be audio-recorded to ensure we accurately capture your story. All recordings will be stored securely and anonymously.
2. Your participation is entirely voluntary. You may choose to skip any question or stop the interview at any time without any negative consequences.
3. All the information you share will be kept strictly confidential. Any data used in publications will be completely anonymized, with all identifying details removed.

Do you have any questions for me before we start?

If you are comfortable, we will now begin the recording."

**(Begin Audio Recording)**

**II. Core Interview Questions (Approx. 30-45 minutes)**

**1. Opening and Illness Narrative:**

**Main Question:** "To start, could you talk about your treatment experience and psychological feelings after falling ill?"

**Potential Probes:**

**•** "In what specific situations do the feelings you just mentioned typically arise?"

**•** "Could you tell me about a specific moment during your treatment that was particularly significant for you?"

**•** "Was there any particular experience during your treatment that caused a noticeable shift in your psychological state?"

**•** "Conversely, have your psychological feelings ever influenced the treatment process?"

**2. Challenges and Coping:**

**Main Question:** " What challenges did you face following your illness? How did you handle and manage them? "

**Potential Probes:**

**•** "At what specific stage after falling ill did this difficulty you mentioned arise? "

**•** "How did these challenges affect you?"

**•** "What strategies or resources did you find most helpful in managing these difficulties?"

**•** "When you were facing this challenge, did anyone offer you specific help that made you feel like it wasn't so difficult after all?"

**3. Adherence and Motivation:**

**Main Question:** "What, in your opinion, has helped you to stick with your rehabilitation regimen during the course of treatment?"

**Potential Probes:**

**•** " When this support comes through, what specific feelings arise within you?"

**•** " Among these supporting factors, which one is the most indispensable to you? "

**•** "Did your goals or reasons for persevering change over time?"

**4. Perceptions of Change and Growth (PTG Exploration):**

**Main Question:** "Have you observed any significant improvements in your perception of your life, relationships, future, or self? Where can we see these changes? "

**Potential Probes**

**•** "Can you provide an example of where you have seen this change?"

**•** "You mentioned feeling a change in your relationship with others. Could you elaborate on what kind of change that is?"

**•** " Why do you feel that you have undergone such a change?"

**•** " Do you think these changes would have happened without this experience? "

**5. Future Outlook:**

**Main Question:** "What are your plans for the future?"

**Potential Probes:**

**•** "How does the future look to you now compared to before your diagnosis?"

**•** "Do these future thoughts you mentioned now relate to your feelings during this post-operative period?"

**•** "If you have plans for the future, have you thought about what your first step might be? "

**III. Conclusion (Approx. 5 minutes)**

"That covers all the questions I have for you today."

**Final Invitation:** "Is there anything else you feel is important about your experience that we haven't had a chance to discuss?"

**Debriefing and Thanks:** "Thank you again for your incredible openness and for sharing your personal story with me. Your insights are invaluable to our research. The next step for us is to analyze all the interviews to better understand the experiences of women like you. Please remember that you can contact me if you have any further questions or concerns."

**(End Audio Recording)**

**IV. Interviewer Guidelines**

**•** Avoid leading questions. For example, do not ask, "You must feel very supported by your family, right?" Instead, use neutral phrasing such as, "What has the support from your family meant to you?"

**•** If a participant becomes emotionally distressed (e.g., starts crying), pause the interview. Offer tissues and say, "It's okay. We can stop here for a moment if you need, or we can talk about something else when you feel ready." Do not rush the participant or invalidate their feelings (e.g., avoid saying, "Don't be sad, things will get better").

**•** During documentation, focus on annotating: specific examples mentioned by the participant, keywords reflecting emotions (e.g., 'felt useless,' 'seeing my child gave me motivation'), and non-verbal cues (e.g., looking down, slowed speech), as these are crucial for subsequent analysis.
